# Supplementary material for: An Environmental Financial System for Accelerating the Development of Climate-friendly Products and Services
Source: Research Square preprint supplement (doi:10.21203/rs.3.rs-2252170/v1), 2022-11-15
Supplement: Supplementary file 1 [file 06a008e9a43dd523035de521.pdf]

**To whom it may concern**

The author declares that the data supporting the findings of this study are available within the article and its supplementary information files.

A handwritten signature in blue ink, consisting of stylized, overlapping loops and curves, positioned above a horizontal line.

---

Jay Pazos
